# Supplementary material for: Hyaluronic Acid Coated Acid-Sensitive Nanoparticles for Targeted Therapy of Adjuvant-Induced Arthritis in Rats
Source: MDPI journal article supplement (doi:10.3390/molecules24010146), 2019-01-02
Supplement: s1 [file s1]

# Hyaluronic Acid Coated Acid-Sensitive Nanoparticles for Targeted Therapy of Adjuvant-induced Arthritis in Rats

Changhui Yu <sup>1</sup>; Xiangyu Li <sup>1</sup>; Yufei Hou<sup>#1</sup>; Xiangxue Meng<sup>#1</sup>; Deli Wang; Jiaxin Liu <sup>1</sup>; Fengying Sun <sup>1\*</sup> and Youxin Li <sup>1\*</sup>

<sup>1</sup> School of Life Sciences, Jilin University, Changchun, Jilin, 130012, China;

\* Corresponding author: Fengying Sun and Youxin Li

<sup>#</sup> These authors contributed equally to this work

Email: sunfengying@jlu.edu.cn, liyouxin@jlu.edu.cn; Tel: +86-431-85155320; Fax: +86-431-85155320

**Table S1** Compositions and characteristics of HAPNPs (n=3)

| Batch | PCADK<br>(mg) | egg PC<br>(mg) | PEI<br>(mg) | HA<br>( $\mu$ L) | Size<br>(d.nm)   | PDI               | Zeta potential<br>(mV) |
|-------|---------------|----------------|-------------|------------------|------------------|-------------------|------------------------|
| F15   | 20            | 8              | 1           | 500              | 121.6 $\pm$ 2.21 | 0.167 $\pm$ 0.013 | 25.83 $\pm$ 4.78       |

Note: Data are expressed as mean  $\pm$  standard deviation.

**Table S2** Compositions and characteristics of HANPs (n=3)

| Batch | PLGA<br>(mg) | egg PC<br>(mg) | PEI<br>(mg) | HA<br>( $\mu$ L) | Size<br>(d.nm)   | PDI               | Zeta potential<br>(mV) |
|-------|--------------|----------------|-------------|------------------|------------------|-------------------|------------------------|
| F17   | 20           | 8              | 1           | 500              | 135.3 $\pm$ 1.27 | 0.249 $\pm$ 0.008 | -15.20 $\pm$ 1.40      |

Note: Data are expressed as mean  $\pm$  standard deviation.

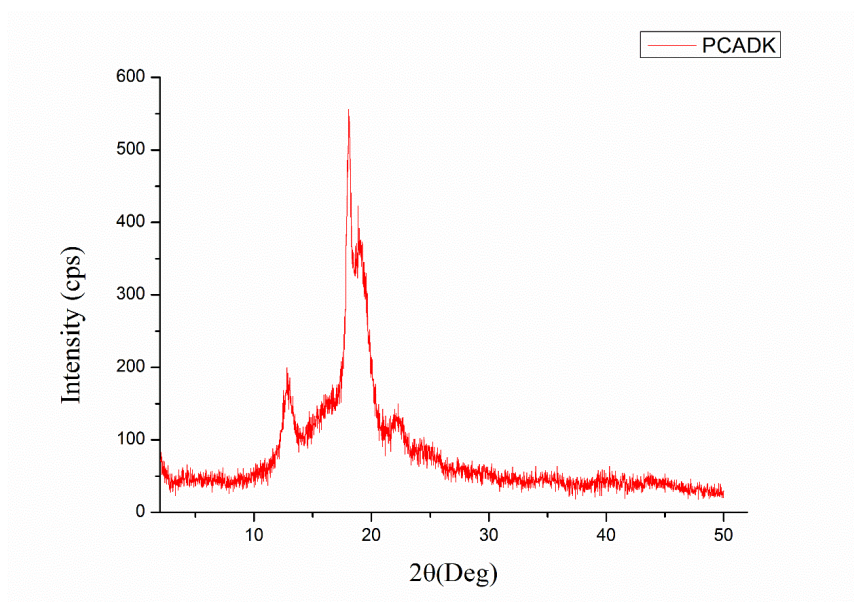

**Figure S1** The XPRD spectra of PCADK.

Powder X-ray diffraction data (XRD) were recorded on a Rigaku D/ SmartLab (3) X-ray diffractometer using a Cu target radiation source (50 kV, 200 mA). And the crystallinity of PCADK is 66.65%.
